# Supplementary material for: Aquaculture of Animal Species: Their Eukaryotic Parasites and the Control of Parasitic Infections
Source: MDPI journal article supplement (doi:10.3390/biology13010041), 2024-01-11
Supplement: s1 [file s1]

## Supplementary materials

**Table S1.** Selected references for various combinations of parasite taxa and important aquacultured species. (Supports Table 2)

| Taxa raised in aquaculture |        |               |                 |                        |                  |                  |                    |             |         |
|----------------------------|--------|---------------|-----------------|------------------------|------------------|------------------|--------------------|-------------|---------|
| Parasites                  | Corals | Anne-<br>lida | Gastro-<br>poda | Bival-<br>via          | Cepha-<br>lopoda | Crusta-<br>cea   | Pisces             | Anurans     | Turtles |
| <b>Protista</b>            |        |               |                 |                        |                  |                  |                    |             |         |
| Protozoa                   |        |               | [1]             | [1-3]                  |                  | [2]              | [4, 5]             | [6, 7]      |         |
| Amoebae                    |        |               | [8, 9]          |                        |                  |                  |                    | [10]        |         |
| Ciliates                   |        | [11]          | [8]             | [3, 12, 13]            | [14]             | [15, 16]         | [17, 18]           | [19]        |         |
| Flagellates                |        | [8]           | [8]             |                        |                  |                  | [17, 20, 21]       |             |         |
| Dinoflagellata             |        |               |                 | [22]                   |                  | [9]              | [17, 23, 24]       |             |         |
| Alveolata                  |        |               | [1]             | [1, 12, 25]            | [14, 26]         |                  |                    | [19]        |         |
| Cercozoans                 |        |               |                 | [1, 12, 22,<br>27-29]  |                  | [30]             |                    |             | [31]    |
| Agregata                   |        |               |                 |                        | [20]             | [20]             |                    |             |         |
| Ascetosporea               |        |               |                 | [22]                   |                  |                  |                    |             |         |
| <b>Fungi, etc.</b>         |        |               |                 |                        |                  |                  |                    |             |         |
| Oomycetes                  |        |               |                 |                        |                  | [32, 33]         | [4, 32, 34]        | [32]        |         |
| Microsporidia              |        |               | [35, 36]        | [3, 35]                | [32]             | [15, 33]         | [4, 37]            |             |         |
| Other                      |        |               | [8, 38]         | [15, 22, 38]           | [14]             | [15, 39]<br>[33] | [4, 17, 40,<br>41] |             |         |
| <b>Plantae</b>             |        |               |                 |                        |                  |                  |                    |             |         |
| Green algae?               |        |               | [42]            | [42, 43]               |                  | [33]             | [40, 42]           |             | [42]    |
| Other                      |        |               | [8]             |                        |                  |                  |                    |             |         |
| <b>Animalia</b>            |        |               |                 |                        |                  |                  |                    |             |         |
| Porifera                   |        |               |                 | [3, 22]                |                  |                  |                    |             |         |
| Cnidaria                   |        |               |                 | [3]                    |                  |                  |                    |             |         |
| Myxozoa                    |        | [11, 44, 45]  |                 |                        |                  |                  | [4, 46, 47]        | [20]        |         |
| Acoela                     | [48]   |               |                 |                        |                  |                  |                    |             |         |
| Acanthocephala             |        |               |                 |                        | [26]             | [33]             | [4]                |             |         |
| Rhombzoa                   |        |               |                 |                        | [14]             |                  |                    |             |         |
| Annelida                   |        |               |                 | [49]                   |                  |                  | [4, 50]            |             |         |
| Branchiura                 |        |               |                 |                        | [3]              |                  |                    |             |         |
| Citellata                  |        |               |                 | [51]                   |                  | [33]             |                    |             |         |
| Polychaetes                |        |               |                 | [15, 17, 49,<br>51-53] |                  | [33]             |                    |             |         |
| Oligochaetes               |        |               | [13]            |                        |                  | [33]             |                    |             |         |
| Hirudinea                  |        |               | [8, 13, 54]     | [17]                   |                  |                  | [37]               |             |         |
| Nematoda                   |        |               | [8, 55, 56]     | [3, 12, 22]            | [14, 57]         | [16, 33]         | [4, 58, 59]        | [6, 60, 61] |         |
| <b>Platyhelminthes</b>     |        |               |                 |                        |                  |                  |                    |             |         |
| Polycladidia               | [48]   |               |                 |                        |                  |                  |                    |             |         |
| Turbellaria                |        |               | [8]             | [3, 62]                |                  | [33]             |                    |             |         |
| Monogenea                  |        |               |                 |                        | [14, 20]         | [20]             | [5, 63, 64]        | [20]        | [20]    |
| Digenea                    | [48]   | [11, 65]      | [8, 65, 66]     | [12, 22, 67]           | [14, 57]         | [33]             | [17, 64, 68]       | [61, 69]    |         |
| Cestoda                    |        | [11]          |                 | [3, 12, 22]            | [14]             | [16, 33]         | [4, 17, 64]        | [17]        |         |
| Temnocephala-<br>lidae     |        |               |                 |                        |                  | [33]             |                    |             |         |
| Nemertinea                 |        |               |                 | [3]                    |                  |                  |                    |             |         |

|                              |              |      |            |                     |              |          |                  |      |
|------------------------------|--------------|------|------------|---------------------|--------------|----------|------------------|------|
| <b>Mollusca</b>              |              |      |            |                     |              |          |                  |      |
| Gastropoda                   | [48, 70, 71] | [3]  | [72]       | [3, 73, 74]         |              |          |                  |      |
| Bivalvia                     |              |      |            |                     |              |          | [75-78]          |      |
| <b>Arthropoda</b>            | [48]         |      |            |                     |              |          | [4, 79]          | [79] |
| Decapoda                     |              |      |            | [3, 22, 62]         |              |          |                  |      |
| Copepoda, Ostracoda, Isopoda | [48, 80]     | [80] | [3, 8, 80] | [3, 12, 22, 62, 80] | [14, 57, 80] | [33, 80] | [17, 77, 80, 81] | [79] |
| Branchiura                   |              |      |            |                     | [14, 57]     |          | [77]             |      |
| Cirripedia                   | [48]         |      |            | [48]                |              |          |                  |      |
| Acarina Mites                |              |      |            | [13, 82]            |              | [33]     | [77]             |      |
| <b>Pisces</b>                |              |      |            |                     |              |          | [83, 84]         |      |

## References

1. Corbeil, S. and F.C.J. Berthe, *Disease and mollusc quality*, in *Shellfish Safety and Quality*. 2009. p. 270-294.
2. Berthe, F.C.J., et al., *Marteiliosis in molluscs: A review*. Aquatic Living Resources, 2004. **17**(4): p. 433-448.
3. Cheng, T., *Parasites of commercially important marine molluscs*. Advances in marine biology. New York: Academic, 1967: p. 199-261.
4. Noga, E.J., *Fish Disease. Diagnosis and Treatment*. 2010: Wiley-Blackwell. 519.
5. Shafiq, A., et al., *Parasite Diversity in a Freshwater Ecosystem*. Microorganisms, 2023. **11**(8).
6. Hernandez-Valdivia, E., et al., *Gastrointestinal parasites in bullfrogs (*Lithobates catesbeianus*) in aquaculture production units in the Mexican central highlands*. Rev Bras Parasitol Vet, 2023. **32**(2): p. e001523.
7. Kudo, R., *On the protozoa parasitic in frogs*. Transactions of the American Microscopical Society, 1922. **41**(2): p. 59-76.
8. O'Brien, M.F. and S. Pellett, *Diseases of Gastropoda*. Front Immunol, 2021. **12**: p. 802920.
9. Bradbury, P.C., *Parasitic Protozoa of Molluscs and Crustacea*, in *Parasitic Protozoa*. 1994. p. 139-264.
10. Weisbrod, T.C., et al., *Gastrointestinal entamoebiasis in captive anurans in North America*. Dis Aquat Organ, 2021. **143**: p. 109-118.
11. Stroud, J.L., *Diseases of annelids*, in *Invertebrate Pathology*. 2022. p. 163-170.
12. Jones, J.B. and J. Creeper, *Diseases of Pearl Oysters and Other Molluscs: A Western Australian Perspective*. Journal of Shellfish Research, 2006. **25**(1): p. 233-238.
13. McElwain, A., *Are parasites and diseases contributing to the decline of freshwater mussels (*Bivalvia*, *Unionida*)?* Freshwater Mollusk Biology and Conservation, 2019. **22**(2): p. 85-89.
14. Gestal, C., et al., *Handbook of pathogens and diseases in cephalopods*. 2019: Springer.
15. Chong, R.S.-M., *General introduction to pathophysiology of finfish, crustacea, and mollusks*, in *Aquaculture Pathophysiology*. 2022. p. 49-71.
16. Dominguez-Machin, M.E., et al., *Survey of protozoan, helminth and viral infections in shrimp *Litopenaeus setiferus* and prawn *Macrobrachium acanthurus* native to the Jamapa River region, Mexico*. Dis Aquat Organ, 2011. **96**(2): p. 97-103.
17. Hecht, T. and F. Endemann, *The impact of parasites, infections and diseases on the development of aquaculture in sub-Saharan Africa*. Journal of Applied Ichthyology, 1998. **14**(3-4): p. 213-221.
18. Bradbury, P.C., *Ciliates of Fish*, in *Parasitic Protozoa*. 1994. p. 81-138.
19. de Jager, G.P., L. Basson, and J. van Marwijk, *A New Trichodina Species (*Peritrichia: Mobilida*) from Anuran Tadpole Hosts, *Sclerophrys* spp. in the Okavango Panhandle, Botswana, with Comments on this Taxon*. Acta Protozoologica, 2019. **58**(3): p. 141-153.
20. Paladini, G., et al., *Parasitic Diseases in Aquaculture: Their Biology, Diagnosis and Control*, in *Diagnosis and Control of Diseases of Fish and Shellfish*. 2017. p. 37-107.
21. Woo, P.T.K., *Flagellate Parasites of Fish*, in *Parasitic Protozoa*. 1994. p. 1-80.
22. *Diseases and parasites*, in *Marine Bivalve Molluscs*. 2015. p. 429-477.
23. Jacobs, D.L., *A new parasitic dinoflagellate from fresh-water fish*. Transactions of the American Microscopical Society, 1946. **65**(1): p. 1-17.
24. Hoffman, G.L., H. Bishop, and C. Dunbar, *Algal parasite in fish*. The Progressive Fish-Culturist, 1960. **22**(4): p. 180-180.
25. Soudant, P., E.C. FL, and A. Volety, *Host-parasite interactions: Marine bivalve molluscs and protozoan parasites, *Perkinsus* species*. J Invertebr Pathol, 2013. **114**(2): p. 196-216.
26. Vidal, E.A., et al., *Cephalopod culture: current status of main biological models and research priorities*. Adv Mar Biol, 2014. **67**: p. 1-98.

27. Arzul, I. and R.B. Carnegie, *New perspective on the haplosporidian parasites of molluscs*. J Invertebr Pathol, 2015. **131**: p. 32-42. 48
28. Carrasco, N., T. Green, and N. Itoh, *Marteilia spp. parasites in bivalves: A revision of recent studies*. J Invertebr Pathol, 2015. **131**: p. 43-57. 49
29. Lynch, S.A., et al., *Detection of haplosporidian protistan parasites supports an increase to their known diversity, geographic range and bivalve host specificity*. Parasitology, 2020. **147**(5): p. 584-592. 50
30. Stentiford, G.D., et al., *Haplosporidium littoralis sp. nov.: a crustacean pathogen within the Haplosporida (Cercozoa, Ascetosporea)*. Dis Aquat Organ, 2013. **105**(3): p. 243-52. 51
31. Mendonca, M.A., et al., *Detection of Hemopathogens in Chelonoidis carbonaria: Microscopic, Molecular, Hematological, and Clinical Biochemistry Aspects*. Vector Borne Zoonotic Dis, 2023. **23**(10): p. 520-527. 52
32. van den Berg, A.H., et al., *The impact of the water moulds *Saprolegnia diclina* and *Saprolegnia parasitica* on natural ecosystems and the aquaculture industry*. Fungal Biology Reviews, 2013. **27**(2): p. 33-42. 53
33. Edgerton, B.F., et al., *Synopsis of freshwater crayfish diseases and commensal organisms*. Aquaculture, 2002. **206**(1-2): p. 57-135. 54
34. Sandoval-Sierra, J.V., et al., *Saprolegnia species affecting the salmonid aquaculture in Chile and their associations with fish developmental stage*. Aquaculture, 2014. **434**: p. 462-469. 55
35. Carella, F. and G. De Vico, *Pathology, epidemiology, and phylogeny of mussel egg disease due to the microsporidian Steinhausia mytilovum (Field, 1924) in the Mediterranean mussel (Mytilus galloprovincialis)*. J Invertebr Pathol, 2023. **198**: p. 107927. 56
36. Elizabeth McClymont, H., et al., *Molecular data suggest that microsporidian parasites in freshwater snails are diverse*. Int J Parasitol, 2005. **35**(10): p. 1071-8. 57
37. Jithendran, K., *Parasites and Parasitic Diseases in Fish Culture System*. 2014, Not Available. 58
38. Czczuga, B., *Zoosporic fungi growing on freshwater molluscs*. Polish Journal of Environmental Studies, 2000. **9**(3): p. 151-156. 59
39. Song, T., et al., *Common disease-discriminatory fungal taxa accurately diagnose shrimp white feces syndrome, black gills, and retardation diseases*. Aquaculture, 2022. **561**. 60
40. Zhou, A., et al., *Interaction of environmental eukaryotic microorganisms and fungi in the pond-cultured carps: new insights into the potential pathogenic fungi in the freshwater aquaculture*. Environ Sci Pollut Res Int, 2021. **28**(29): p. 38839-38854. 61
41. Levy, M.G., et al., *Piscinoodinium, a fish-ectoparasitic dinoflagellate, is a member of the class Dinophyceae, subclass Gymnodiniphyceidae: convergent evolution with Amyloodinium*. Journal of Parasitology, 2007. **93**(5): p. 1006-1015. 62
42. Vinyard, W. *Epizootic algae from mollusks, turtles, and fish in Oklahoma*. in *Proceedings of the Oklahoma Academy of Science*. 1953. 63
43. Zhao, L., et al., *New insight into light-enhanced calcification in mytilid mussels, Mytilus sp., infected with photosynthetic algae Coccomyxa sp.:  $\delta^{13}\text{C}$  value and metabolic carbon record in shells*. Journal of Experimental Marine Biology and Ecology, 2019. **520**. 64
44. Yokoyama, H., D. Grabner, and S. Shirakashi, *Transmission biology of the Myxozoa*. Health and environment in aquaculture, 2012: p. 3-42. 65
45. Okamura, B., A. Gruhl, and J.L. Bartholomew, *An introduction to myxozoan evolution, ecology and development*. 2015: Springer. 66
46. Blaylock, R.B. and S.A. Bullard, *Counter-insurgents of the blue revolution? Parasites and diseases affecting aquaculture and science*. J Parasitol, 2014. **100**(6): p. 743-55. 67
47. Kent, M.L., et al., *Recent advances in our knowledge of the Myxozoa*. J Eukaryot Microbiol, 2001. **48**(4): p. 395-413. 68
48. Barton, J.A., et al., *Parasites and coral - associated invertebrates that impact coral health*. Reviews in Aquaculture, 2020. **12**(4): p. 2284-2303. 69
49. Sato-Okoshi, W., et al., *Polydorid species (Annelida: Spionidae) associated with commercially important oyster shells and their shell infestation along the coast of Normandy, in the English Channel, France*. Aquaculture International, 2022. **31**(1): p. 195-230. 70
50. ÖKtener, A. and N. Arslan, *A general review of parasitic Annelida (Hirudinea) recorded from different habitats and hosts in Turkey*. Turkish Journal of Zoology, 2012. 71

51. Tan, K., et al., *Research progress of shell boring mud-blister worm infestation in shellfish aquaculture*. Aquaculture, 2023. **574**. 90
52. Martinelli, J.C., et al., *Evaluating treatments for shell-boring polychaete (Annelida: Spionidae) infestations of Pacific oysters (Crassostrea gigas) in the US Pacific Northwest*. Aquaculture, 2022. **561**. 91
53. Rodewald, N., R. Snyman, and C.A. Simon, *Worming its way in-Polydora websteri (Annelida: Spionidae) increases the number of non-indigenous shell-boring polydorin pests of cultured molluscs in South Africa*. Zootaxa, 2021. **4969**(2): p. 255279. 92
54. Mack, J.M., et al., *Cryptic carnivores: Intercontinental sampling reveals extensive novel diversity in a genus of freshwater annelids*. Mol Phylogenet Evol, 2023. **182**: p. 107748. 93
55. Morley, N.J., *Aquatic molluscs as auxiliary hosts for terrestrial nematode parasites: implications for pathogen transmission in a changing climate*. Parasitology, 2010. **137**(7): p. 1041-56. 94
56. Grewal, P., et al., *Parasitism of molluscs by nematodes: types of associations and evolutionary trends*. Journal of nematology, 2003. **35**(2): p. 146. 95
57. Iglesias, J., L. Fuentes, and R. Villanueva, *Cephalopod culture*. 2014: Springer Science & Business Media. 96
58. Eiras, J.C., et al., *An Overview of Fish-borne Nematodiasis among Returned Travelers for Recent 25 Years- Unexpected Diseases Sometimes Far Away from the Origin*. Korean J Parasitol, 2018. **56**(3): p. 215-227. 97
59. Bakenhaster, M.D., et al., *Philometra floridensis (Nematoda: Philometridae) damages ovarian tissue without reducing host (Sciaenops ocellatus) fecundity*. Dis Aquat Organ, 2014. **108**(3): p. 227-39. 98
60. Bursey, C.R. and D.R. Brooks, *Nematode Parasites of 41 Anuran Species from the Area de Conservación Guanacaste, Costa Rica*. Comparative Parasitology, 2010. **77**(2): p. 221-231. 99
61. Chikhlyayev, I.V. and A.B. Ruchin, *Helminths of amphibians (Amphibia) in beaver ponds in the Central Russia*. Aquaculture, Aquarium, Conservation & Legislation, 2020. **13**(6): p. 3810-3821. 100
62. Sanil, N. and K. Vijayan, *Diseases and Parasites of Bivalves*. 2011. 101
63. Hoai, T.D., *Reproductive strategies of parasitic flatworms (Platyhelminthes, Monogenea): the impact on parasite management in aquaculture*. Aquaculture International, 2019. **28**(1): p. 421-447. 102
64. Bautista-Hernández, C.E., et al., *Helminth communities of Xiphophorus malinche (Pisces: Poeciliidae), endemic freshwater fish from the Pánuco River, Hidalgo, Mexico*. Revista Mexicana de Biodiversidad, 2014. **85**(3): p. 838-844. 103
65. Ditrich, O., et al., *Larval stages of trematodes from freshwater molluscs the Yucatan Peninsula, Mexico*. Folia Parasitologica, 1997. **44**(2): p. 109-127. 104
66. Barton, D.P., et al., *Parasites of Selected Freshwater Snails in the Eastern Murray Darling Basin, Australia*. Int J Environ Res Public Health, 2022. **19**(12). 105
67. Curran, S.S., R.D. Gonzales, and S.A. Bullard, *Molecular Characterization of Sporocysts and Cercariae (Digenea: Bucephalidae) Infecting the Eastern Oyster Crassostrea Virginica from Virginia*. J Parasitol, 2023. **109**(3): p. 259-263. 106
68. Pinto, H.A., et al., *Experimental and molecular study of cercariae of Clinostomum sp. (Trematoda: Clinostomidae) from Biomphalaria spp. (Mollusca: Planorbidae) in Brazil*. J Parasitol, 2015. **101**(1): p. 108-13. 107
69. Crotti, M., *Digenetic Trematodes: an existence as parasites. Brief general overview*. Microbiologia Medica, 2013. **28**(2). 108
70. Gittenberger, A. and B. Hoeksema, *Habitat preferences of 20 Indo-West Pacific wentletrap species (Gastropoda: Epitoniidae) associated with scleractinian corals*. 2006, Chapter. 109
71. Hoeksema, B. and A. Gittenberger, *Records of some marine parasitic molluscs from Nha Trang, Vietnam*. Basteria, 2008. **72**(4/6): p. 129-133. 110
72. Maguire, A.K. and L. Rogers-Bennett, *An ectoparasitic snail (Evalea tenuisculpta) infects red abalone (Haliotis rufescens) in northern California*. California Fish and Game, 2013. **99**(2): p. 80-89. 111
73. Cumming, R.L. and R.A. Alford, *Population dynamics of Turbonilla sp. (Pyramidellidae, Opisthobranchia), an ectoparasite of giant clams in mariculture*. Journal of experimental marine biology and ecology, 1994. **183**(1): p. 91-111. 112

74. Boglio, E. and J. Lucas, *Impacts of ectoparasitic gastropods on growth, survival, and physiology of juvenile giant clams (Tridacna gigas), including a simulation model of mortality and reduced growth rate*. Aquaculture, 1997. **150**(1-2): p. 25-43.
75. Horne, L., D. DeVries, and J. Stoeckel, *The Effects of Glochidia Infection on the Metabolic Rate and Hypoxia Tolerance of Bluegill Lepomis Macrochirus and Largemouth Bass Micropterus Salmoides*. J Parasitol, 2022. **108**(5): p. 467-475.
76. Chowdhury, M.M.R., T.J. Marjomäki, and J. Taskinen, *Effect of glochidia infection on growth of fish: freshwater pearl mussel Margaritifera margaritifera and brown trout Salmo trutta*. Hydrobiologia, 2019. **848**(12-13): p. 3179-3189.
77. Heckmann, R., *Other ectoparasites infesting fish: Copepods, branchiurans, isopods, mites and bivalves*. AQUACULTURE MAGAZINE-ARKANSAS-, 2003. **29**(6): p. 20-31.
78. Zieritz, A., et al., *Identifying freshwater mussels (Unionoida) and parasitic glochidia larvae from host fish gills: a molecular key to the North and Central European species*. Ecol Evol, 2012. **2**(4): p. 740-50.
79. Kupferberg, S.J., et al., *Parasitic Copepod (Lernaea cyprinacea) Outbreaks in Foothill Yellow-legged Frogs (Rana boylei) Linked to Unusually Warm Summers and Amphibian Malformations in Northern California*. Copeia, 2009. **2009**(3): p. 529-537.
80. Williams, E.H. and L. Bunkley-Williams, *Life Cycle and Life History Strategies of Parasitic Crustacea*, in *Parasitic Crustacea*. 2019. p. 179-266.
81. Mic, R., E. Rehulkova, and M. Seifertova, *Species of Ergasilus von Nordmann, 1832 (Copepoda: Ergasilidae) from cichlid fishes in Lake Tanganyika*. Parasitology, 2023. **150**(7): p. 579-598.
82. Edwards, D.D. and M.F. Vidrine, *Host Diversity Affects Parasite Diversity: A Case Study Involving Unionicola spp. Inhabiting Freshwater Mussels*. J Parasitol, 2020. **106**(5): p. 675-678.
83. Silva, S., et al., *The haematophagous feeding stage of anadromous populations of sea lamprey Petromyzon marinus: low host selectivity and wide range of habitats*. Hydrobiologia, 2014. **734**(1): p. 187-199.
84. Salinger, J.M. and R.L. Johnson, *Parasitism of Rainbow Trout in Hatchery Raceways by Chestnut Lampreys*. North American Journal of Aquaculture, 2019. **81**(3): p. 230-234.
